# Supplementary material
Source: PubMed Central journal article supplement (PMC6248116)
Supplement: jamaneurol-75-1392-s001.pdf [file jamaneurol-75-1392-s001.pdf]

## Supplementary Online Content

van der Vuurst de Vries RM, Mescheriakova JY, Wong YYM, et al. Application of the 2017 revised McDonald criteria for multiple sclerosis to patients with a typical clinically isolated syndrome. *JAMA Neurol*. Published online August 6, 2018.  
doi:10.1001/jamaneurol.2018.2160

**eTable.** Test Characteristics for 2010 and 2017 Criteria

This supplementary material has been provided by the authors to give readers additional information about their work.

**eTable. Test characteristics for 2010 and 2017 criteria**

|                            | <b>DIS 2010</b><br>(n=229) | <b>DIS 2017</b><br>(n=229) |                            | <b>DIT 2010</b><br>(n=180) | <b>DIT 2017 (OCB excluded)</b><br>(n=180) | <b>DIT 2017 (OCB included)</b><br>(n=180) | <b>DIS+DIT 2010</b><br>(n=180) | <b>DIS+DIT 2017 (OCB excluded)</b><br>(n=180) | <b>DIS+DIT 2017 (OCB included)</b><br>(n=180) |
|----------------------------|----------------------------|----------------------------|----------------------------|----------------------------|-------------------------------------------|-------------------------------------------|--------------------------------|-----------------------------------------------|-----------------------------------------------|
| <b>Sensitivity (95%CI)</b> |                            |                            | <b>Sensitivity (95%CI)</b> |                            |                                           |                                           |                                |                                               |                                               |
| 1yr (n=229)                | 71 (52-85)                 | 84 (66-94)                 | 1yr (n=180)                | 33 (16-55)                 | 58 (37-77)                                | 96 (77-100)                               | 33 (16-55)                     | 58 (37-77)                                    | 79 (57-92)                                    |
| 2yr (n=208)                | 72 (58-83)                 | 83 (70-92)                 | 2yr (n=159)                | 31 (18-47)                 | 50 (34-66)                                | 83 (68-93)                                | 31 (18-47)                     | 50 (34-66)                                    | 67 (50-80)                                    |
| 5yr (n=125)                | 61 (48-74)                 | 75 (62-86)                 | 5yr (n=88)                 | 33 (20-49)                 | 49 (34-64)                                | 81 (66-91)                                | 33 (20-49)                     | 47 (32-62)                                    | 61 (45-75)                                    |
| Total fu (n=229)           | 66 (56-74)                 | 79 (70-86)                 | Total fu (n=180)           | 36 (27-47)                 | 51 (40-61)                                | 84 (74-90)                                | 36 (27-47)                     | 50 (39-60)                                    | 68 (57-77)                                    |
| <b>Specificity (95%CI)</b> |                            |                            | <b>Specificity (95%CI)</b> |                            |                                           |                                           |                                |                                               |                                               |
| 1yr (n=229)                | 49 (41-56)                 | 38 (31-45)                 | 1yr (n=180)                | 76 (68-82)                 | 65 (57-73)                                | 34 (27-42)                                | 76 (68-82)                     | 67 (59-75)                                    | 50 (42-58)                                    |
| 2yr (n=208)                | 49 (41-58)                 | 39 (31-47)                 | 2yr (n=159)                | 75 (66-83)                 | 65 (56-73)                                | 33 (25-42)                                | 75 (66-83)                     | 68 (58-76)                                    | 47 (38-56)                                    |
| 5yr (n=125)                | 56 (43-68)                 | 49 (36-61)                 | 5yr (n=88)                 | 82 (67-92)                 | 71 (56-83)                                | 40 (26-56)                                | 82 (67-92)                     | 73 (62-85)                                    | 51 (36-66)                                    |
| Total fu (n=229)           | 57 (47-66)                 | 48 (39-58)                 | Total fu (n=180)           | 85 (76-92)                 | 75 (65-84)                                | 44 (34-55)                                | 85 (76-92)                     | 78 (67-85)                                    | 61 (50-71)                                    |
| <b>PPV (95%CI)</b>         |                            |                            | <b>PPV (95%CI)</b>         |                            |                                           |                                           |                                |                                               |                                               |
| 1yr (n=229)                | 18 (12-26)                 | 17 (12-25)                 | 1yr (n=197)                | 17 (83-32)                 | 21 (12-32)                                | 18 (12-26)                                | 17 (8.3-32)                    | 22 (13-34)                                    | 20 (13-29)                                    |
| 2yr (n=208)                | 33 (25-43)                 | 32 (25-41)                 | 2yr (n=159)                | 31 (18-47)                 | 34 (23-47)                                | 31 (23-40)                                | 31 (18-47)                     | 36 (24-49)                                    | 31 (22-42)                                    |
| 5yr (n=125)                | 54 (41-66)                 | 55 (44-66)                 | 5yr (n=88)                 | 63.6 (41-82)               | 62 (44-77)                                | 57 (43-69)                                | 64 (41-82)                     | 63 (44-78)                                    | 55 (39-68)                                    |
| Total fu (n=229)           | 60 (51-68)                 | 60 (51-68)                 | Total fu (n=180)           | 72 (56-83)                 | 68 (55-78)                                | 60 (51-69)                                | 72 (56-84)                     | 69 (56-80)                                    | 64 (54-73)                                    |
| <b>NPV (95%CI)</b>         |                            |                            | <b>NPV (95%CI)</b>         |                            |                                           |                                           |                                |                                               |                                               |
| 1yr (n=229)                | 91 (84-96)                 | 94 (85-98)                 | 1yr (n=180)                | 88 (81-93)                 | 91 (84-95)                                | 99 (89-100)                               | 88 (81-93)                     | 91 (84-96)                                    | 94 (86-98)                                    |
| 2yr (n=208)                | 84 (74-90)                 | 87 (76-94)                 | 2yr (n=159)                | 75 (66-83)                 | 78 (69-86)                                | 84 (70-93)                                | 75 (66-83)                     | 79 (70-86)                                    | 80 (68-88)                                    |
| 5yr (n=125)                | 63 (50-75)                 | 70 (55-82)                 | 5yr (n=88)                 | 56 (43-68)                 | 59 (45-72)                                | 69 (48-85)                                | 56 (43-68)                     | 59 (45-72)                                    | 58 (41-73)                                    |
| Total fu (n=229)           | 63 (53-72)                 | 70 (59-80)                 | Total fu (n=180)           | 57 (48-65)                 | 60 (50-69)                                | 72 (58-83)                                | 57 (48-65)                     | 60 (50-69)                                    | 65 (54-75)                                    |
| <b>Accuracy (95%CI)</b>    |                            |                            | <b>Accuracy (95%CI)</b>    |                            |                                           |                                           |                                |                                               |                                               |
| 1yr (n=229)                | 52 (45-58)                 | 44 (38-51)                 | 1yr (n=180)                | 70 (63-77)                 | 64 (57-71)                                | 42.2 (35-49)                              | 70 (63-77)                     | 66 (59-73)                                    | 54 (48-61)                                    |
| 2yr (n=208)                | 55 (49-62)                 | 51 (44-57)                 | 2yr (n=159)                | 64 (56-71)                 | 61 (53-69)                                | 45.9 (38-54)                              | 64 (56-71)                     | 63 (56-71)                                    | 52 (44-60)                                    |
| 5yr (n=125)                | 58 (50-67)                 | 61 (52-69)                 | 5yr (n=88)                 | 58 (48-68)                 | 60 (50-70)                                | 60 (50-70)                                | 58 (48-68)                     | 60 (50-70)                                    | 56 (55-66)                                    |
| Total fu (n=229)           | 61 (55-67)                 | 63 (57-70)                 | Total fu (n=180)           | 61 (54-68)                 | 63 (56-70)                                | 64 (57-71)                                | 61 (54-68)                     | 63 (57-70)                                    | 64 (57-71)                                    |
| <b>Hazard ratio</b>        | 2.0 (1.3-                  | 2.7 (1.7-                  | <b>Hazard ratio</b>        | 1.9 (1.2-                  | 2.0 (1.3-3.0)                             | 2.6 (1.5-4.6)                             | 1.9 (1.2-2.9)                  | 2.1 (1.4-3.2)                                 | 2.0 (1.3-3.1)                                 |

|         |      |      |         |      |  |  |  |  |  |
|---------|------|------|---------|------|--|--|--|--|--|
| (95%CI) | 2.9) | 4.2) | (95%CI) | 2.9) |  |  |  |  |  |
|---------|------|------|---------|------|--|--|--|--|--|

Abbreviations: DIS, dissemination in space; DIT, dissemination in time; OCB, oligoclonal bands; 95%CI, 95% confidence interval; fu, follow-up; PPV, positive predictive value; NPV, negative predictive value
